# Supplementary material for: Preparation of cellulose acetate derived carbon nanofibers by ZnCl2 activation as a supercapacitor electrode
Source: Royal Society of Chemistry journal article supplement (doi:10.1039/c8ra07587e), 2019-01-01
Supplement: c8ra07587e1.pdf [file c8ra07587e1.pdf]

---

# **Preparation of cellulose acetate derived carbon nanofibers by ZnCl<sub>2</sub> activation as supercapacitor electrode**

Qingchao Fan <sup>1</sup>, Chang Ma <sup>1,\*</sup>, Liqiang Wu <sup>1</sup>, Chengbiao Wei <sup>1</sup>, Huihui

Wang <sup>1</sup>, Yan Song <sup>2,\*</sup>, Jingli Shi <sup>1,\*</sup>

<sup>1</sup> *Tianjin Municipal Key Lab of Advanced Fiber and Energy Storage Technology, Tianjin Polytechnic University, Tianjin 300387, China*

<sup>2</sup> *CAS Key Laboratory of Carbon Materials, Institute of Coal Chemistry, Chinese Academy of Sciences, Taiyuan, 030001, China*

## Supplementary Data

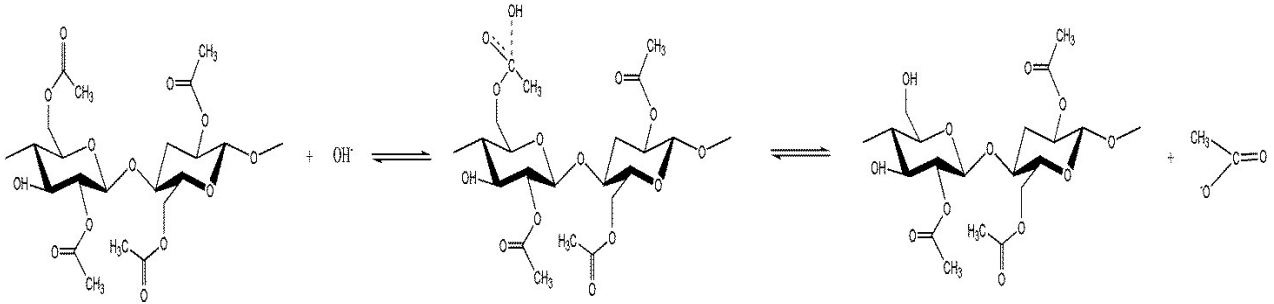

Fig.S1-The hydrolysis of cellulose esters in alkaline solutions leads to the regeneration of cellulose from cellulose acetate.

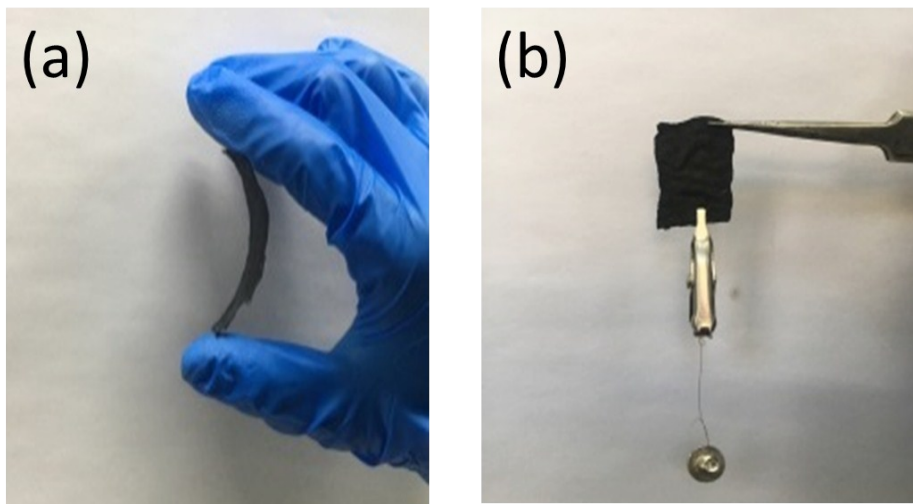

Fig.S2-Photograph of the carbonized fiber films (CACNF-ZnCl<sub>2</sub>-20%). (a) bent carbonized fiber films (b) carbonized fiber films.
